# Supplementary material for: When, where, and how prey pair antipredator behaviors to natural and anthropogenic mortality risks
Source: Research Square preprint supplement (doi:10.21203/rs.3.rs-5984114/v1), 2025-04-28
Supplement: Supplementary file 1 [file ff78227c5b51307ff8e6d297.docx]

**Appendix 1: Supplemental Methods**

**Deer Field Methods**

Deer were captured between January – March from 2019 to 2023 beginning after the end of deer hunting season and continuing until green up in each location. Deer were captured using Clover traps, darting, and drop nets (Vercauteren et al. 1999). Captured deer were immobilized with an intramuscular injection of Buturphanol-azaperone medetomidine (BAM) (ZooPharm, Butler et al. 2017). Dosages of BAM were determined based on the capture method, sex, and size of deer (McDermott et al. 2020). For deer capture using clover traps or drop nets, dosages ranged from 0.5 for fawns to 3.0 cc for large males. Darting was primarily used to target adult males, so all darts were filled with 2.0 – 3.0 cc of BAM (McDermott et al. 2020). Clover traps were placed in areas deer are likely to use frequently, baited with corn, and checked once to twice per day for deer. For males and large adult females, traps were always collapsed, and deer were injected with BAM. Yearlings and smaller deer were processed by manual restraint if deemed safe. Deer were darted from blinds placed roughly 30 meters from a corn pile. Upon darting a deer, darters waited roughly 5 minutes to allow the deer to run away safely and drugs to take effect without further chase. Deer were located using VHF equipment as quickly as possible and additional BAM administered if needed. Drop nets were placed in open areas where groups of deer congregate and baited with multiple corn piles. A crew of up to four people waited in a blind or vehicle for deer to move under the center of the net and waited to drop the net until all deer had their head down. Deer were first manually restrained and then chemically immobilized in order of placement from closest to the edge to nearest to the center of the net. Fix interval for collars varied between years resulting in deer trajectories sampled at different frequencies that ranged from two hours to thirty minutes.

**Predator Field Methods**

Bobcats and coyotes in both study sites were captured using cage traps (Tomahawk Live Trap, Hazelhurst, Wisconsin, Model 209.5, and homemade cage traps with similar dimensions, Beltrán and Tewes 1995) and rubber-padded foothold traps (Minnesota Trapline Products, Pennock, Minnesota, MB-650-RJ, Skinner and Todd 1990) during four winter capture seasons from January through March 2018 and 2019, and from mid-November through March 2019-2020 and 2020-2021. Bobcats were chemically immobilized with ketamine hydrochloride and xylazine hydrochloride and recovered inside a cage trap before release (ZooPharm, Beltrán and Tewes 1995). Coyotes were chemically immobilized with BAMand were reversed post-handling with naltrexone hydrochloride and atipamezole hydrochloride before release.

Captured coyotes and bobcats were fitted with LiteTrack Iridium 250 GPS collars (Lotek Wireless, Newmarket, Ontario, Canada) equipped with a release mechanism to drop off. Most collars recorded GPS locations once every 1.5 hours, but 14 collars had a different schedule (1, 2, 3, or 4 hours). Each animal was also weighed, measured, sexed, aged (juvenile or adult), scored for body condition, fitted with an ear tag, and had a biopsy sample taken from the ear. Fifteen bobcat-years (female n=7, male n=8) and 31 coyote-years (female n=12, male n=19) of location data were collected from 13 individual bobcats and 31 individual coyotes over the four trapping seasons. An average of 1,397 GPS locations were obtained from each bobcat (range 293-2,695) and an average of 1,736 locations were obtained from each coyote (range 213-3,596).

**Predator RSFs**

To determine individual-level habitat selection, we used a logistic regression to estimate

resource selection functions (RSFs) for each individual within the annual home ranges (Manly et

al. 2002, Bastille-Rousseau and Wittemyer 2019). To estimate the annual home ranges of bobcats and coyotes, we used autocorrelated kernel density estimation (AKDE), as developed by Fleming et al. (2015). We used the package ‘ctmm’ in Program R (Calabrese et al. 2016) to estimate home ranges. Home range sizes were calculated using the Ornstein-Uhlenbeck with foraging (OUF) model using a 0.95 quantile. Twelve thousand random locations were generated within

each of these home ranges. Each random location was also assigned a random date and time

(Bastille-Rousseau et al. 2015). Bobcat and coyote RSFs were estimated using the package ‘IndRSA’ in Program R (Bastille-Rousseau and Wittemyer 2019). ‘IndRSA’ estimates an individual-level RSF for each individual and a population average in a second step (Murtaugh 2007). K-fold cross-validations were performed for each output. We used yearly predator RSFs, because predictions from seasonal RSFs did not greatly differ (Gorman et al. 2024). Land cover categories, human modification, distance to water, and distance to road covariates were extracted for each used and random point. Land cover categories included the dummy variables of forested (reference category), agricultural, exurban and other. The continuous variables of human modification, distance to water, and distance to road covariates were scaled so they could be compared to ease interpretation (Schielzeth 2010).

**References**

Beltrán, J.F., & Tewes, M.E. (1995). Immobilization of ocelots and bobcats with ketamine hydrochloride and xylazine hydrochloride. Journal of Wildlife Diseases, 31(1), 43–48. https://doi.org/10.7589/0090-3558-31.1.43

Butler, Z., Gamba, D., Morris, S., Zahratka, J., & Lehmer, E.M. (2017). Novel use of a rapidly reversible field anesthetic in small game mammals using yellow-bellied marmots (Marmota flaviventris) as a model organism. BIOS, 88(4), 135–143. https://doi.org/10.1893/BIOS-D-16-00004.1

Gorman, N. T., Eichholz, M. W., Skinner, D. J., Schlichting, P. E., & Bastille-Rousseau, G. (2024). Carnivore space use behaviors reveal variation in responses to human land modification. Movement Ecology, 12(1), 51.

McDermott, J.R., Leuenberger, W., Haymes, C.A., Clevinger, G.B., Trudeau, J.K., Carter, T.C., Hast, J.T., Jenkins, G.S. W., Bowling, W.E., & Cox, J.J. (2020). Safe Use of Butorphanol–Azaperone–Medetomidine to Immobilize Free‐Ranging White‐tailed Deer. Wildlife Society Bulletin, 44(2), 281–291. https://doi.org/10.1002/wsb.1096

Rockhill, A.P., Chinnadurai, S.K., Powell, R.A., & DePerno, C. S. (2011). A Comparison of Two Field Chemical Immobilization Techniques for Bobcats (Lynx rufus). Journal of Zoo and Wildlife Medicine, 42(4), 580–585. https://doi.org/10.1638/2010-0152.1

VerCauteren, K.C., Beringer, J., & Hygnstrom, S.E. (1999). Use of Netted Cage Traps for Capturing White-Tailed Deer.

**Appendix 2: Supplemental Tables**

**AICc Model Ranking from step selection function (SSF) and hidden Markov models (HMM).**

| Model | AICc |
| --- | --- |
| coyote+roaddist+int | 101645.2 |
| bobcat+roaddist+int | 101951.7 |
| coyote+hummod | 102111.3 |
| coyote+hummod+int | 102115.7 |
| coyote+hunt+int | 102402.4 |
| bobcat+roaddist | 102417 |
| hummod | 102417 |
| coyote+roaddist | 102418.7 |
| bobcat+hummod | 102426.9 |
| bobcat+hummod+int | 102449.4 |
| coyote+hunt | 102477.3 |
| coyote | 102486 |
| coyote+bobcat+int | 102491.2 |
| coyote+bobcat | 102516.1 |
| roaddist | 102524.2 |
| bobcat+hunt+int | 102743.2 |
| bobcat+hunt | 102763.9 |
| bobcat | 102773.4 |
| hunt | 102865.6 |
| null | 102869.6 |

Table 1: AICc scores for SSFs for bucks during the hunting period in the encamped state.

| Model | AICc |
| --- | --- |
| coyote+hummod | 152775.4 |
| coyote+hummod+int | 152870.1 |
| bobcat+hummod | 152905.8 |
| hummod | 152911.3 |
| bobcat+hummod+int | 153009.9 |
| coyote+roaddist+int | 153182.7 |
| bobcat+roaddist+int | 153311.2 |
| coyote+bobcat+int | 153495.6 |
| bobcat+roaddist | 153679.6 |
| coyote+roaddist | 153703.6 |
| roaddist | 153878.9 |
| coyote+hunt | 154129.3 |
| coyote+hunt+int | 154152.2 |
| coyote+bobcat | 154213.4 |
| bobcat+hunt | 154229.2 |
| coyote | 154232.1 |
| bobcat+hunt+int | 154255.5 |
| hunt | 154287.9 |
| bobcat | 154320 |
| null | 154373.8 |

Table 2: AICc scores for SSFs during the hunting period in the active state.

| Model | AICc |
| --- | --- |
| coyote+hummod | 227906.8 |
| coyote+hummod+int | 227963.9 |
| hummod | 228191.1 |
| bobcat+hummod+int | 228284.1 |
| roaddist | 228467.9 |
| coyote+roaddist | 228492.7 |
| bobcat+roaddist | 228493.3 |
| coyote+bobcat+int | 229063.5 |
| coyote+hunt+int | 229128 |
| bobcat+hunt | 229179 |
| bobcat+hunt+int | 229191 |
| coyote+bobcat | 229327.3 |
| coyote | 229367.4 |
| bobcat | 229427.6 |
| null | 229701.8 |
| coyote+hunt | 229828.9 |
| hunt | 229955.9 |
| bobcat+hummod | 230083 |
| coyote+roaddist+int | 230210.1 |
| bobcat+roaddist+int | 230337.1 |

Table 3: AICc scores for SSFs for bucks during the hunting period in the directed state.

| Model | AICc |
| --- | --- |
| coyote+roaddist+int | 112258 |
| bobcat+roaddist+int | 112370.9 |
| roaddist | 112754.9 |
| bobcat+roaddist | 112791.8 |
| coyote+roaddist | 112801.6 |
| coyote+hummod | 112849.6 |
| bobcat+hummod | 112876.9 |
| coyote+hummod+int | 112878.7 |
| hummod | 112885.7 |
| bobcat+hummod+int | 112897.9 |
| coyote+hunt | 112900.2 |
| coyote+bobcat | 112901.3 |
| bobcat+hunt | 112912.8 |
| coyote+hunt+int | 112920.4 |
| bobcat+hunt+int | 112934.4 |
| coyote | 112938.7 |
| coyote+bobcat+int | 112945.4 |
| bobcat | 112950.6 |
| hunt | 112964.5 |
| null | 112998.2 |

Table 4: AICc scores for SSFs for bucks during the fawning period in the encamped state.

| Model | AICc |
| --- | --- |
| coyote+hummod | 197392.7 |
| coyote+hummod+int | 197417.9 |
| hummod | 197430.3 |
| bobcat+hummod | 197511.5 |
| bobcat+hummod+int | 197561.8 |
| coyote+roaddist+int | 197673.4 |
| bobcat+roaddist+int | 197830.7 |
| bobcat+roaddist | 197955.2 |
| coyote+bobcat+int | 197981.7 |
| coyote+roaddist | 198019.7 |
| roaddist | 198180.4 |
| coyote | 198330.7 |
| coyote+hunt | 198339.1 |
| coyote+hunt+int | 198348.7 |
| bobcat | 198407.7 |
| bobcat+hunt | 198414.5 |
| bobcat+hunt+int | 198432.1 |
| null | 198457.4 |
| hunt | 198470.4 |
| coyote+bobcat | 198619.8 |

Table 5: AICc scores for SSFs for bucks during the fawning period in the active state.

| Model | AICc |
| --- | --- |
| coyote+hummod+int | 324873.4 |
| coyote+hummod | 324902.3 |
| bobcat+hummod | 324937.6 |
| bobcat+hummod+int | 324948.8 |
| hummod | 325144.2 |
| bobcat+roaddist+int | 325572.7 |
| coyote+roaddist+int | 325576.8 |
| bobcat+roaddist | 325728.6 |
| coyote+roaddist | 325787.2 |
| roaddist | 325899.5 |
| coyote+bobcat+int | 326245.9 |
| coyote+hunt+int | 326421.3 |
| coyote+hunt | 326433.9 |
| bobcat+hunt+int | 326506.1 |
| coyote+bobcat | 326539.1 |
| coyote | 326557.7 |
| bobcat | 326614.7 |
| hunt | 326724.8 |
| null | 326836.1 |
| bobcat+hunt | 327114.3 |

Table 6: AICc scores for SSFs for bucks during the fawning period in the directed state.

| Model | AICc |
| --- | --- |
| hummod | 112819.4 |
| null | 112850.2 |
| hunt | 112866.8 |
| bobcat+hummod | 112891.6 |
| bobcat+hummod+int | 112920.7 |
| coyote+hunt | 112942.9 |
| bobcat+hunt | 112967.3 |
| coyote+hunt+int | 112991.7 |
| bobcat+hunt+int | 113016.1 |
| coyote | 113040.5 |
| bobcat | 113064.9 |
| roaddist | 113089.3 |
| coyote+bobcat | 113113.7 |
| coyote+bobcat+int | 113138.1 |
| coyote+hummod | 113162.5 |
| coyote+hummod+int | 113186.9 |
| coyote+roaddist | 113211.3 |
| coyote+roaddist+int | 113235.7 |
| bobcat+roaddist | 113260.1 |
| bobcat+roaddist+int | 113284.5 |

Table 7: AICc scores for SSFs for bucks during the baseline period in the encamped state.

| Model | AICc |
| --- | --- |
| hummod | 281413.1 |
| coyote+hummod | 281444.8 |
| bobcat+hummod | 281483.7 |
| coyote+hummod+int | 281486.9 |
| bobcat+hummod+int | 281523.7 |
| bobcat+roaddist | 281527.6 |
| roaddist | 281551.2 |
| coyote+roaddist+int | 281564.9 |
| coyote+hunt+int | 281611 |
| coyote+hunt | 281623.6 |
| null | 281707.8 |
| bobcat+hunt | 281719 |
| bobcat | 281740.7 |
| bobcat+hunt+int | 281755.8 |
| coyote | 281782.5 |
| hunt | 281809.2 |
| coyote+bobcat | 281835.8 |
| coyote+bobcat+int | 281862.5 |
| coyote+roaddist | 281889.2 |
| bobcat+roaddist+int | 281915.9 |

Table 8: AICc scores for SSFs for bucks during the baseline period in the active state.

| Model | AICc |
| --- | --- |
| hummod | 390171.2 |
| coyote+hummod | 390196.8 |
| coyote+roaddist+int | 390217.5 |
| bobcat+hummod+int | 390218.7 |
| bobcat+roaddist+int | 390226.7 |
| bobcat+roaddist | 390259.2 |
| hunt | 390349.4 |
| bobcat+hunt | 390381.3 |
| bobcat+hunt+int | 390401.9 |
| coyote+bobcat+int | 390414.7 |
| null | 390546.7 |
| bobcat | 390590.3 |
| coyote+hunt | 390572.3 |
| coyote+hunt+int | 390609.4 |
| coyote | 390646.5 |
| roaddist | 390683.6 |
| coyote+bobcat | 390720.7 |
| coyote+hummod+int | 390757.8 |
| bobcat+hummod | 390794.9 |
| coyote+roaddist | 390832 |

Table 9: AICc scores for SSFs for bucks for the baseline period in the directed state.

| Model | AICc |
| --- | --- |
| coyote+hummod+int | 776248.8 |
| bobcat+hummod+int | 776346.7 |
| coyote+hummod | 776377.7 |
| bobcat+hummod | 776468.2 |
| hummod | 776579.9 |
| coyote+bobcat+int | 777312.2 |
| coyote+bobcat | 777694.6 |
| coyote+hunt+int | 777789.6 |
| coyote+hunt | 777930.8 |
| bobcat+hunt+int | 778000.9 |
| bobcat+hunt | 778041.8 |
| coyote | 778055.2 |
| bobcat | 778147.2 |
| hunt | 778152.9 |
| null | 778268.9 |
| roaddist | 778746.9 |

Table 10: AICc scores for SSFs for does for the hunting period in the encamped state.

| coyote+hummod+int | 1086671 |
| --- | --- |
| bobcat+hummod+int | 1086904 |
| bobcat+hummod | 1086904 |
| hummod | 1087001 |
| coyote+bobcat+int | 1087031 |
| coyote+bobcat | 1087474 |
| roaddist | 1087613 |
| coyote+hunt+int | 1087640 |
| coyote+hunt | 1087647 |
| coyote | 1087747 |
| bobcat+hunt | 1087862 |
| bobcat+hunt+int | 1087876 |
| bobcat | 1087938 |
| hunt | 1087991 |
| null | 1088068 |
| coyote+hummod | 1088292 |

Table 11: AICc scores for SSFs for does for the hunting period in the active state.

| Model | AICc |
| --- | --- |
| hummod | 631105.7 |
| coyote+hummod+int | 631114.2 |
| coyote+hummod | 631185.6 |
| bobcat+hummod | 631189.8 |
| roaddist | 631440.4 |
| bobcat+hummod+int | 631488.3 |
| coyote+bobcat+int | 631608.1 |
| coyote+bobcat | 631655.5 |
| coyote+hunt+int | 631703.1 |
| coyote+hunt | 631740 |
| hunt | 631755.9 |
| null | 631764.3 |
| bobcat+hunt | 631775 |
| bobcat+hunt+int | 631793.3 |
| bobcat | 631799.3 |
| coyote | 631990.4 |

Table 12: AICc scores for SSFs for does during the hunting period in the directed state.

| Model | AICc |
| --- | --- |
| coyote+hummod+int | 915912.1 |
| bobcat+hummod | 915942.1 |
| hummod | 915995.5 |
| coyote+hummod | 916004.7 |
| roaddist | 916989.9 |
| coyote+bobcat+int | 917258.1 |
| coyote+bobcat | 917508.5 |
| bobcat+hunt+int | 917615.7 |
| coyote+hunt+int | 917619.1 |
| coyote+hunt | 917630.9 |
| bobcat+hunt | 917662.8 |
| hunt | 917703.8 |
| coyote | 917768.7 |
| bobcat | 917794.1 |
| null | 917848.8 |
| bobcat+hummod+int | 918384.8 |

Table 13: AICc scores for SSFs for does during the fawning period in the encamped state.

| Model | AICc |
| --- | --- |
| bobcat+hummod+int | 1469416 |
| coyote+hummod+int | 1469450 |
| bobcat+hummod | 1469473 |
| coyote+hummod | 1469568 |
| hummod | 1469683 |
| roaddist | 1470027 |
| coyote+bobcat+int | 1470119 |
| coyote+bobcat | 1470325 |
| coyote+hunt+int | 1470332 |
| bobcat+hunt | 1470332 |
| bobcat+hunt+int | 1470339 |
| coyote+hunt | 1470360 |
| bobcat | 1470496 |
| coyote | 1470545 |
| hunt | 1470550 |
| null | 1470725 |

Table 14: AICc scores for SSFs for does during the fawning period in the active state.

| 3 fawn doe |  |
| --- | --- |
| Model | AICc |
| coyote+hummod+int | 759367.2 |
| roaddist | 759736.5 |
| bobcat+hummod+int | 759840.2 |
| coyote+hummod | 759849.3 |
| hummod | 759863.6 |
| bobcat+hummod | 759906.4 |
| coyote+bobcat+int | 760001.7 |
| coyote+hunt+int | 760046.6 |
| coyote+hunt | 760088.2 |
| coyote+bobcat | 760104 |
| bobcat+hunt | 760148.6 |
| hunt | 760152.2 |
| bobcat+hunt+int | 760158.7 |
| coyote | 760255.6 |
| null | 760303.4 |
| bobcat | 760306.9 |

Table 15: AICc scores for SSFs for does during the fawning period in the directed state.

| Model | AICc |
| --- | --- |
| coyote+hummod+int | 1088419 |
| coyote+hummod | 1088559 |
| bobcat+hummod+int | 1088600 |
| bobcat+hummod | 1088639 |
| hummod | 1088700 |
| coyote+bobcat+int | 1089155 |
| roaddist | 1089566 |
| coyote+hunt+int | 1089615 |
| coyote+bobcat | 1089650 |
| coyote+hunt | 1089747 |
| bobcat+hunt+int | 1089860 |
| bobcat+hunt | 1089865 |
| hunt | 1090000 |
| coyote | 1090031 |
| bobcat | 1090143 |
| null | 1090325 |

Table 16: AICc scores for SSFs for does during the baseline period in the encamped state.

| Model | AICc |
| --- | --- |
| coyote+hummod+int | 1598453 |
| coyote+hummod | 1598578 |
| bobcat+hummod | 1598617 |
| hummod | 1598860 |
| coyote+hunt+int | 1598993 |
| coyote+bobcat | 1599082 |
| coyote+hunt | 1599110 |
| bobcat+hunt+int | 1599184 |
| roaddist | 1599223 |
| bobcat | 1599330 |
| hunt | 1599463 |
| null | 1599627 |
| bobcat+hunt | 1599686 |
| coyote | 1599785 |
| coyote+bobcat+int | 1599884 |

Table 17: AICc scores for SSFs for does during the baseline period in the active state.

| Model | AICc |
| --- | --- |
| coyote+hummod+int | 767768.8 |
| coyote+hummod | 767829.6 |
| bobcat+hummod+int | 767849 |
| bobcat+hummod | 767875.5 |
| hummod | 767879.5 |
| coyote+bobcat+int | 767986.6 |
| roaddist | 768013.6 |
| coyote+hunt+int | 768095.6 |
| coyote+bobcat | 768099.5 |
| coyote+hunt | 768127.5 |
| bobcat+hunt+int | 768128.7 |
| bobcat+hunt | 768136.9 |
| hunt | 768139.4 |
| coyote | 768164 |
| bobcat | 768172.8 |
| null | 768174.2 |

Table 18: AICc scores for SSFs for does during the baseline period in the directed state.

| AICc | Model |
| --- | --- |
| 144975.5 | forest + coyote_pred + bobcat_pred + coyote_pred * bobcat_pred |
| 145042.7 | forest +coyote_pred + as.factor(hunt) + coyote_pred * as.factor(hunt) |
| 145053.5 | forest + bobcat_pred + hummod |
| 145071.9 | forest + bobcat_pred + dist_road + bobcat_pred * dist_road |
| 145125.8 | forest + coyote_pred + hummod + coyote_pred * hummod |
| 145191 | forest +bobcat_pred + as.factor(hunt) + bobcat_pred * as.factor(hunt) |
| 145238.3 | forest + coyote_pred + hummod |
| 145242 | forest + dist_road |
| 145247.7 | forest + coyote_pred + as.factor(hunt) |
| 145274.8 | forest + coyote_pred + dist_road |
| 145277.6 | forest + bobcat_pred + hummod + bobcat_pred * hummod |
| 145280 | forest + coyote_pred |
| 145285.8 | forest + bobcat_pred + as.factor(hunt) |
| 145314 | forest + as.factor(hunt) |
| 145322.8 | forest + bobcat_pred |
| 145326.4 | forest + hummod |
| 145358.7 | forest |

Table 19: AICc scores for HMMs for bucks during the fawning period.

| AICc | Model |
| --- | --- |
| 147520 | forest + coyote_pred + as.factor(hunt) + coyote_pred * as.factor(hunt) |
| 147560.9 | forest + coyote_pred + bobcat_pred + coyote_pred * bobcat_pred |
| 147661.3 | forest + coyote_pred + dist_road |
| 147665 | forest + coyote_pred + dist_road + coyote_pred * dist_road |
| 147670 | forest + coyote_pred + hummod |
| 147682.5 | forest + bobcat_pred + dist_road + bobcat_pred * dist_road |
| 147713.9 | forest + bobcat_pred + as.factor(hunt) |
| 147718.8 | forest + bobcat_pred + as.factor(hunt) + bobcat_pred * as.factor(hunt) |
| 147735.2 | forest + dist_road |
| 147756.4 | forest + coyote_pred + as.factor(hunt) |
| 147764.2 | forest + bobcat_pred + hummod + bobcat_pred * hummod |
| 147772.6 | forest + as.factor(hunt) |
| 147813.3 | forest + bobcat_pred + hummod |
| 147817.9 | forest + coyote_pred + hummod + coyote_pred * hummod |
| 147821.9 | forest + bobcat_pred |
| 147840.6 | forest + hummod |

Table 20: AICc scores for HMMs for bucks for the baseline period.

| AICc | Model |
| --- | --- |
| 104413.5 | forest + bobcat_pred + hummod + bobcat_pred * hummod |
| 104444.9 | forest + coyote_pred + hummod |
| 104445.3 | forest + coy ote_pred + bobcat_pred + coyote_pred * bobcat_pred |
| 104445.6 | forest + bobcat_pred + dist_road |
| 104459.3 | forest + bobcat_pred + hummod |
| 104490 | forest + coyote_pred |
| 104509.6 | forest +bobcat_pred + dist_road + bobcat_pred * dist_road |
| 104515 | forest + coyote_pred + dist_road |
| 104521.5 | forest + dist_road |
| 104523.1 | forest +coyote_pred + dist_road + coyote_pred * dist_road |
| 104533.3 | forest + bobcat_pred + as.factor(hunt) |
| 104533.9 | forest + hummod |
| 104564.2 | forest + coyote_pred |
| 104569.3 | forest + bobcat_pred |
| 104592.5 | forest |

Table 21: AICc scores for the HMMs for bucks for the hunting period.

| AICc | Model |
| --- | --- |
| 809625.6 | forest + coyote_pred + bobcat_pred + coyote_pred * bobcat_pred |
| 810069.4 | forest + coyote_pred + dist_road + coyote_pred * dist_road |
| 810117.7 | forest +coyote_pred + as.factor(hunt) + coyote_pred * as.factor(hunt) |
| 810133.5 | forest + coyote_pred + hummod + coyote_pred * hummod |
| 810207.4 | forest + coyote_pred + dist_road |
| 810207.7 | forest + coyote_pred + as.factor(hunt) |
| 810218.1 | forest + coyote_pred + hummod |
| 810218.4 | forest + coyote_pred |
| 810273.3 | forest + bobcat_pred + hummod + bobcat_pred * hummod |
| 810314.9 | forest + bobcat_pred + dist_road + bobcat_pred * dist_road |
| 810347.6 | forest +bobcat_pred + as.factor(hunt) + bobcat_pred * as.factor(hunt) |
| 810410.7 | forest + bobcat_pred + dist_road |
| 810413.2 | forest + bobcat_pred + as.factor(hunt) |
| 810419.7 | forest + bobcat_pred + hummod |
| 810429.5 | forest + bobcat_pred |
| 810468 | forest + dist_road |
| 810491.7 | forest + as.factor(hunt) |
| 810494.6 | forest + hummod |
| 810502.3 | forest |

Table 22: AICc scores for HMMs for does for the baseline period.

| AICc | Model |
| --- | --- |
| 878629.8 | forest + coyote_pred + hummod + coyote_pred * hummod |
| 879147.9 | forest + coyote_pred + bobcat_pred + coyote_pred * bobcat_pred |
| 879149.8 | forest + bobcat_pred + hummod + bobcat_pred * hummod |
| 879188.5 | forest +bobcat_pred + as.factor(hunt) + bobcat_pred * as.factor(hunt) |
| 879210 | forest +coyote_pred + as.factor(hunt) + coyote_pred * as.factor(hunt) |
| 879246.4 | forest + coyote_pred + as.factor(hunt) |
| 879258.9 | forest + bobcat_pred + as.factor(hunt) |
| 879262.1 | forest + coyote_pred + dist_road + coyote_pred * dist_road |
| 879263.2 | forest + bobcat_pred + hummod |
| 879263.3 | forest + coyote_pred + hummod |
| 879283.4 | forest + coyote_pred + dist_road |
| 879287.8 | forest + bobcat_pred + dist_road + bobcat_pred * dist_road |
| 879288.9 | forest + as.factor(hunt) |
| 879290.9 | forest + bobcat_pred + dist_road |
| 879292.4 | forest + hummod |
| 879309.5 | forest + coyote_pred |
| 879311.9 | forest + bobcat_pred |
| 879330 | forest + dist_road |
| 879343.3 | forest |

Table 23: AICc scores for HMMs for does for the fawning period.

| AICc | Model |
| --- | --- |
| 537880.5 | forest + coyote_pred + bobcat_pred + coyote_pred * bobcat_pred |
| 537937.1 | forest + coyote_pred + hummod + coyote_pred * hummod |
| 537949.1 | forest + coyote_pred + hummod |
| 537952 | forest +coyote_pred + as.factor(hunt) + coyote_pred * as.factor(hunt) |
| 537964.8 | forest + coyote_pred + as.factor(hunt) |
| 537965.8 | forest + coyote_pred + dist_road + coyote_pred * dist_road |
| 537971.7 | forest +bobcat_pred + as.factor(hunt) + bobcat_pred * as.factor(hunt) |
| 537976.1 | forest + coyote_pred + dist_road |
| 537983.9 | forest + coyote_pred |
| 538025.4 | forest + bobcat_pred + hummod + bobcat_pred * hummod |
| 538049.2 | forest + bobcat_pred + hummod |
| 538050.5 | forest + bobcat_pred + as.factor(hunt) |
| 538060.2 | forest + bobcat_pred + dist_road |
| 538062.1 | forest + bobcat_pred + dist_road + bobcat_pred * dist_road |
| 538064.1 | forest + bobcat_pred |
| 538152.6 | forest + as.factor(hunt) |
| 538153.5 | forest + hummod |
| 538165.6 | forest + dist_road |
| 538178.8 | forest |

Table 24: AICc scores for HMMs for does for the hunting period.

**Appendix 3: Supplemental Figures**


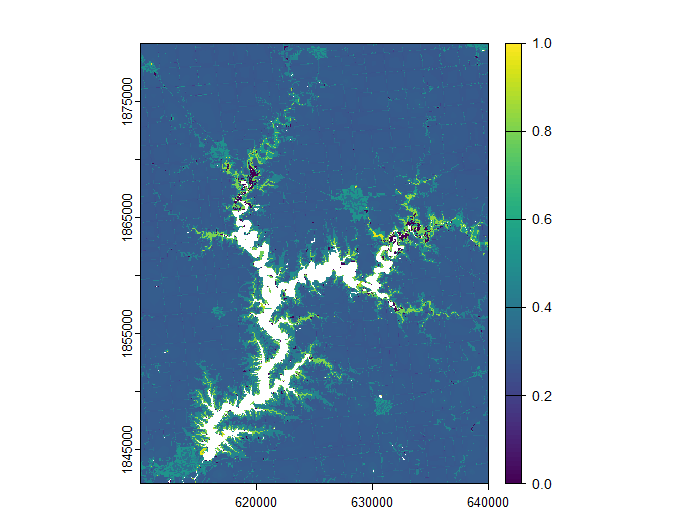


Supplemental Figure 1: Coyote risk layer for the Shelbyville site.


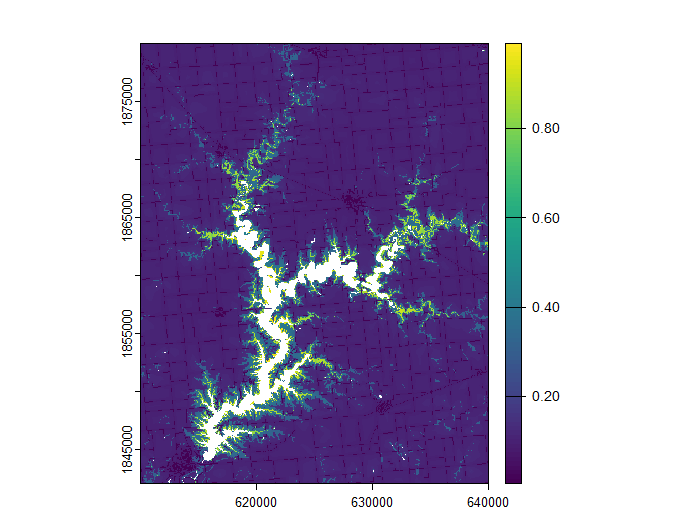


Supplemental Figure 2: Bobcat risk layer for the Touch of Nature site.


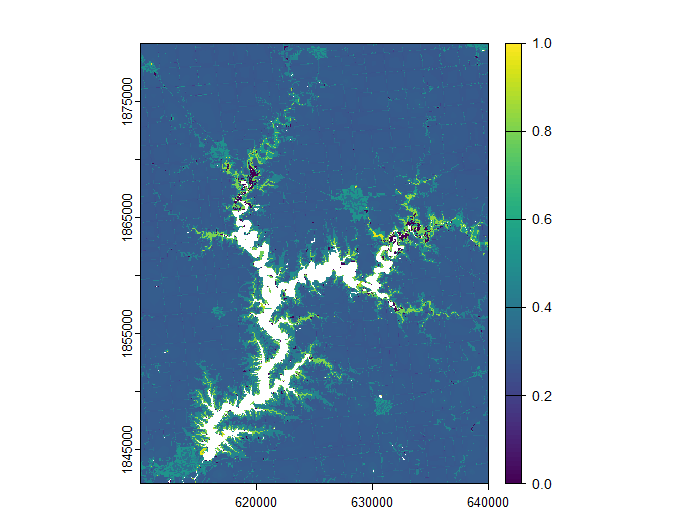


Supplemental Figure 1: Coyote risk layer for the Shelbyville site.


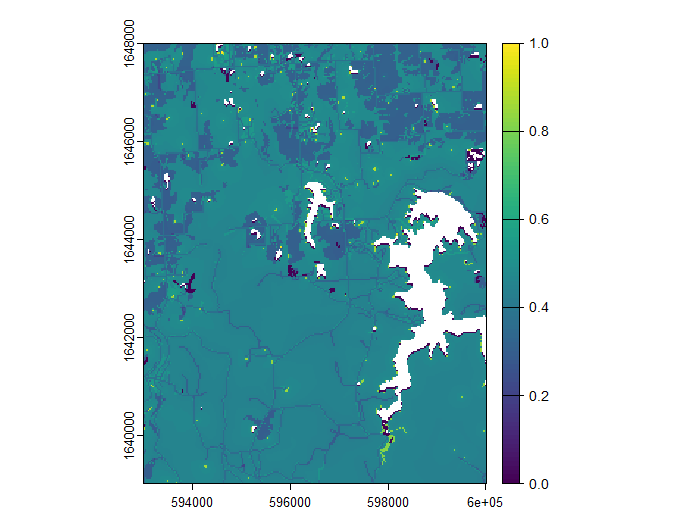


Supplemental Figure 3: Coyote risk layer for the Touch of Nature site.


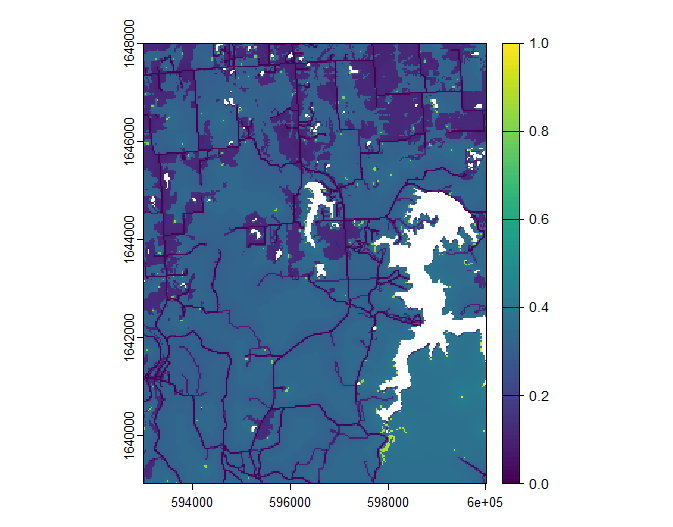


Supplemental Figure 4: Bobcat risk layer for the Touch of Nature site.
